# Supplementary material for: Neuronal pentraxin 2: a synapse-derived CSF biomarker in genetic frontotemporal dementia
Source: PubMed Central journal article supplement (PMC7279197; doi:10.1136/jnnp-2019-322493), 2020-04-09

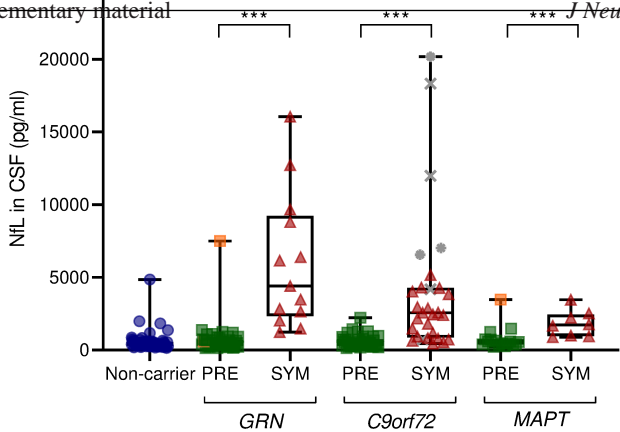

Supplement: jnnp-2019-322493supp005.pdf [file jnnp-2019-322493supp005.pdf]
